# Supplementary material for: (+)-Aeroplysinin-1 Modulates the Redox Balance of Endothelial Cells
Source: MDPI journal article supplement (doi:10.3390/md16090316), 2018-09-06

## *Supplementary material*

### **Supplementary figure legend**

**Figure S1.** A) Chemical structure of (+)-aeropylsinin-1 (Apl-1). B) MTT survival assay. RF-24 cells were treated with different concentrations of Apl-1 for 12 h and the MTT assay was carried out as described in Materials and methods. Data are means  $\pm$  SD for three independent experiments (with 4 replicates each one) and they are given as percentages taken control, untreated-cell values as 100%.

**A**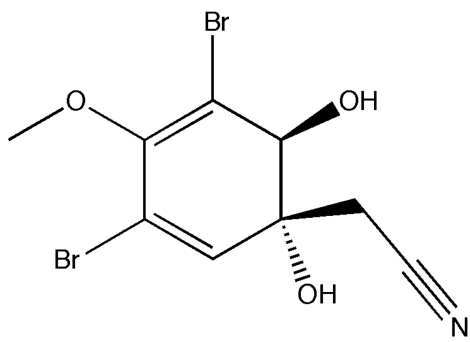**B**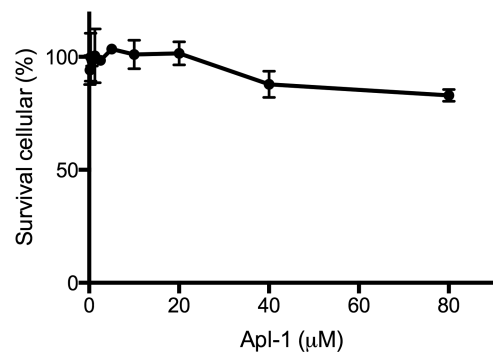

Supplement: s1 [file s1]
